# Supplementary material
Source: publisher figshare collection journal article supplement (https://acs.figshare.com/ndownloader/files/5673411)
Supplement: Supplementary file 1 [file 5673411]

## Supporting Information

### Retention in porous layer pillar array planar separation platforms

Danielle R. Lincoln<sup>†</sup>, Nickolay V. Lavrik<sup>‡</sup>, Ivan I. Kravchenko<sup>‡</sup>, and Michael J. Sepaniak<sup>\*†</sup>

<sup>†</sup>Department of Chemistry, University of Tennessee, Knoxville, TN 37996, USA

<sup>‡</sup>Center for Nanophase Materials Sciences, Oak Ridge National Laboratory, Oak Ridge, TN 37830, USA

\*Email: [msepania@utk.edu](mailto:msepania@utk.edu), Fax: 865-974-9332

#### Contents

1. Determination by simple modeling of surface area increase due to PSO deposition ..... S-2

### Determination by simple modeling of surface area increase due to PSO deposition

Each pillar was assumed to be a cylinder with a height of 20  $\mu\text{m}$  and a radius of 1  $\mu\text{m}$ . The PSO coating was then assumed to be a close-packed arrangement of spheres around this cylinder, adding 0.05, 0.1, or 0.15  $\mu\text{m}$  to the cylinder radius depending on the thickness of PSO deposited. Figure S-1 illustrates this model.

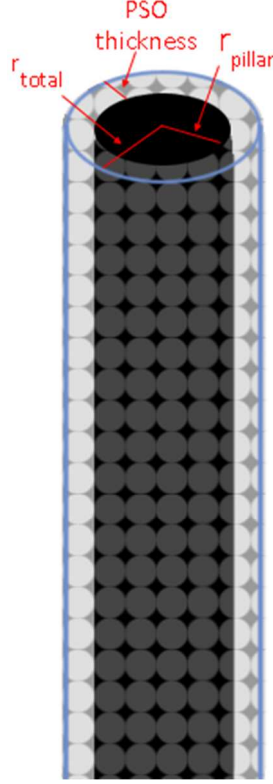

**Figure S-1:** Depiction of the model used to calculate surface area increase.

The volume of PSO,  $V_{\text{PSO}}$ , was calculated by subtracting the volume of the smaller cylinder, without PSO, from that of the larger cylinder. The volume of PSO that is not void,  $V_{\text{porous}}$ , was then calculated using the 34% void fraction determined by ellipsometry

$$V_{\text{porous}} = V_{\text{PSO}} * (1 - \text{void fraction}). \quad (1)$$

The volume of one sphere,  $V_{\text{isphere}}$ , was calculated by assuming that one PSO granule has a radius of 0.0025  $\mu\text{m}$ . This allowed us to calculate the number of spheres present,  $N_{\text{spheres}}$ , using

$$N_{\text{spheres}} = \frac{V_{\text{porous}}}{V_{\text{isphere}}}. \quad (2)$$

The surface area of all the spheres,  $A_{\text{porous}}$ , could then be calculated by

$$A_{\text{porous}} = A_{\text{isphere}} * N_{\text{spheres}} * Rg, \quad (3)$$

where  $A_{\text{isphere}}$  is the surface area of one sphere, assuming a radius of 0.0025  $\mu\text{m}$ , and  $Rg$  is a surface roughness factor assumed to be 3. This value could then be compared to the surface area of the small pillar,  $A_{\text{pillar}}$ , by computing a ratio

$$\text{increased area} = \frac{A_{\text{porous}} + A_{\text{pillar}}}{A_{\text{pillar}}}. \quad (4)$$
